# Supplementary material for: Investigating 3D-printed disk compressing against skin for pain relief in intradermal infiltration anesthesia: a randomized controlled trial
Source: Springer Nature journal article supplement (doi:10.1186/s12871-023-02088-y), 2023-04-28
Supplement: MOESM3 [file 25296468]

| number    | group | gender | age | BMI   | ASA | Pre | Post | fear | VAS | satisf. | usibility |
|-----------|-------|--------|-----|-------|-----|-----|------|------|-----|---------|-----------|
| 202204777 | 1     | m      | 67  | 25.39 | II  | 67  | 65   | 1    | 25  | 5       | 2         |
| 202204680 | 1     | f      | 31  | 20.7  | I   | 70  | 84   | 2    | 14  | 4       | 1         |
| 202205722 | 1     | m      | 34  | 24.22 | I   | 72  | 80   | 2    | 35  | 4       | 1         |
| 202204533 | 1     | m      | 55  | 24.22 | I   | 85  | 90   | 2    | 45  | 3       | 2         |
| 202205718 | 1     | f      | 52  | 20.69 | II  | 70  | 72   | 2    | 20  | 4       | 1         |
| 202205320 | 1     | f      | 48  | 25.39 | I   | 90  | 120  | 1    | 24  | 4       | 1         |
| 202206192 | 1     | m      | 17  | 18.94 | I   | 95  | 85   | 2    | 20  | 5       | 1         |
| 202206153 | 1     | m      | 45  | 25.5  | I   | 67  | 62   | 2    | 21  | 4       | 1         |
| 202206163 | 1     | m      | 32  | 25.25 | I   | 61  | 58   | 0    | 1   | 5       | 1         |
| 202205734 | 1     | f      | 44  | 24.89 | I   | 83  | 70   | 1    | 9   | 3       | 2         |
| 202206024 | 1     | m      | 54  | 21.87 | I   | 60  | 59   | 1    | 19  | 5       | 1         |
| 202205742 | 1     | m      | 27  | 20.76 | I   | 96  | 79   | 2    | 15  | 3       | 3         |
| 202206287 | 1     | m      | 57  | 25.91 | II  | 79  | 80   | 2    | 0   | 5       | 2         |
| 202206266 | 1     | f      | 60  | 27.04 | I   | 63  | 62   | 2    | 10  | 5       | 1         |
| 202206086 | 1     | f      | 52  | 23.73 | I   | 70  | 72   | 2    | 20  | 4       | 1         |
| 202206105 | 1     | m      | 23  | 27.16 | I   | 97  | 108  | 2    | 5   | 5       | 1         |
| 202206449 | 1     | f      | 48  | 20.4  | I   | 86  | 87   | 2    | 20  | 4       | 1         |
| 202206401 | 1     | m      | 52  | 25.25 | I   | 80  | 93   | 1    | 5   | 5       | 1         |
| 202206206 | 1     | m      | 26  | 26.73 | I   | 52  | 50   | 1    | 5   | 5       | 2         |
| 202206023 | 1     | m      | 20  | 16.53 | I   | 70  | 78   | 2    | 0   | 5       | 2         |
| 202206275 | 1     | m      | 33  | 29.39 | I   | 77  | 85   | 2    | 10  | 4       | 2         |
| 202206296 | 1     | m      | 38  | 28.07 | I   | 74  | 77   | 1    | 10  | 5       | 1         |
| 202206255 | 1     | f      | 34  | 19.43 | I   | 112 | 124  | 2    | 40  | 4       | 1         |
| 202206316 | 1     | m      | 73  | 20.76 | I   | 63  | 61   | 1    | 5   | 5       | 1         |
| 202206444 | 1     | m      | 54  | 24.22 | I   | 86  | 86   | 1    | 20  | 5       | 2         |
| 202206503 | 1     | m      | 47  | 22.77 | I   | 85  | 80   | 0    | 0   | 5       | 1         |
| 202206594 | 1     | m      | 46  | 26.2  | I   | 84  | 69   | 1    | 0   | 5       | 1         |
| 202206497 | 1     | f      | 29  | 16.73 | I   | 86  | 84   | 2    | 25  | 5       | 2         |
| 202206542 | 1     | m      | 53  | 25.54 | I   | 60  | 58   | 0    | 5   | 5       | 1         |
| 202206435 | 1     | m      | 43  | 26.23 | II  | 77  | 78   | 2    | 2   | 4       | 1         |
| 202206512 | 1     | m      | 32  | 31.67 | I   | 88  | 77   | 1    | 2   | 5       | 1         |

|           |   |   |    |       |    |     |     |   |    |   |    |
|-----------|---|---|----|-------|----|-----|-----|---|----|---|----|
| 202206504 | 1 | f | 44 | 22.77 | I  | 93  | 85  | 2 | 15 | 5 | 2  |
| 202206717 | 1 | m | 50 | 25.71 | II | 76  | 77  | 0 | 3  | 5 | 1  |
| 202206614 | 1 | m | 29 | 18.13 | I  | 65  | 66  | 1 | 10 | 5 | 1  |
| 202205317 | 1 | m | 38 | 22.86 | I  | 97  | 99  | 1 | 20 | 5 | 1  |
| 202206739 | 1 | f | 49 | 26.67 | II | 72  | 75  | 0 | 10 | 5 | 2  |
| 202206750 | 1 | m | 41 | 27.18 | I  | 87  | 90  | 0 | 10 | 5 | 1  |
| 202205504 | 1 | f | 48 | 23.87 | I  | 63  | 71  | 1 | 20 | 4 | 1  |
| 202206795 | 1 | m | 54 | 22.85 | I  | 78  | 72  | 1 | 15 | 5 | 2  |
| 202206180 | 1 | m | 39 | 26.57 | I  | 74  | 72  | 1 | 20 | 4 | 1  |
| 202206347 | 1 | m | 32 | 24.22 | I  | 93  | 88  | 1 | 10 | 5 | 1  |
| 202206765 | 1 | f | 54 | 26.71 | I  | 67  | 71  | 1 | 10 | 5 | 1  |
| 202206798 | 1 | m | 75 | 24.8  | II | 84  | 92  | 1 | 10 | 5 | 1  |
| 202206843 | 1 | f | 72 | 29.3  | II | 98  | 81  | 0 | 20 | 5 | 1  |
| 202204688 | 2 | m | 57 | 21.51 | II | 108 | 106 | 0 | 50 | 3 | NA |
| 202205753 | 2 | m | 51 | 21.01 | I  | 64  | 70  | 1 | 50 | 4 | NA |
| 202205741 | 2 | f | 63 | 20.81 | II | 78  | 72  | 2 | 44 | 3 | NA |
| 202205844 | 2 | f | 35 | 22.6  | I  | 92  | 97  | 2 | 55 | 5 | NA |
| 202205751 | 2 | m | 33 | 25.95 | I  | 98  | 68  | 1 | 30 | 5 | NA |
| 202206188 | 2 | m | 55 | 20.76 | I  | 67  | 72  | 1 | 20 | 4 | NA |
| 202206049 | 2 | m | 55 | 22.49 | I  | 60  | 57  | 0 | 33 | 5 | NA |
| 202206199 | 2 | m | 34 | 28.37 | I  | 86  | 64  | 0 | 10 | 5 | NA |
| 202206128 | 2 | m | 41 | 26.73 | I  | 81  | 89  | 0 | 0  | 5 | NA |
| 202205205 | 2 | f | 35 | 22.04 | I  | 60  | 57  | 2 | 40 | 5 | NA |
| 202206248 | 2 | f | 52 | 25.39 | I  | 71  | 72  | 2 | 40 | 3 | NA |
| 202206399 | 2 | m | 59 | 25.7  | I  | 73  | 79  | 1 | 50 | 2 | NA |
| 202206388 | 2 | m | 26 | 24.49 | I  | 65  | 70  | 2 | 50 | 2 | NA |
| 202205183 | 2 | m | 56 | 22.31 | I  | 74  | 72  | 1 | 30 | 4 | NA |
| 202206268 | 2 | m | 58 | 19.75 | I  | 77  | 75  | 0 | 30 | 4 | NA |
| 202206366 | 2 | f | 27 | 23.44 | I  | 85  | 67  | 1 | 30 | 3 | NA |
| 202206284 | 2 | f | 63 | 23.43 | II | 117 | 110 | 1 | 28 | 4 | NA |
| 202206247 | 2 | m | 54 | 25.95 | II | 66  | 66  | 1 | 30 | 4 | NA |
| 202205646 | 2 | m | 56 | 26.12 | II | 87  | 79  | 1 | 40 | 4 | NA |

|           |   |   |    |       |    |    |     |   |    |   |    |
|-----------|---|---|----|-------|----|----|-----|---|----|---|----|
| 202206333 | 2 | m | 50 | 31.25 | I  | 56 | 82  | 0 | 10 | 5 | NA |
| 202206253 | 2 | m | 46 | 21.6  | I  | 82 | 75  | 2 | 10 | 5 | NA |
| 202206029 | 2 | m | 52 | 25.47 | I  | 80 | 72  | 0 | 15 | 5 | NA |
| 202206385 | 2 | f | 48 | 24.78 | I  | 80 | 99  | 0 | 50 | 5 | NA |
| 202206420 | 2 | m | 44 | 23.88 | I  | 75 | 71  | 0 | 10 | 5 | NA |
| 202206211 | 2 | f | 53 | 26.94 | I  | 62 | 55  | 1 | 20 | 5 | NA |
| 202206013 | 2 | m | 25 | 21.26 | I  | 80 | 75  | 1 | 40 | 5 | NA |
| 202206058 | 2 | m | 33 | 21.8  | I  | 63 | 67  | 1 | 30 | 4 | NA |
| 202206502 | 2 | m | 49 | 24.22 | I  | 69 | 72  | 1 | 45 | 5 | NA |
| 202206285 | 2 | m | 53 | 22.31 | I  | 65 | 60  | 2 | 15 | 5 | NA |
| 202206511 | 2 | m | 58 | 22.72 | I  | 68 | 69  | 1 | 30 | 5 | NA |
| 202206539 | 2 | f | 49 | 26.04 | I  | 79 | 72  | 0 | 35 | 5 | NA |
| 202206547 | 2 | m | 23 | 26.32 | I  | 68 | 67  | 1 | 35 | 5 | NA |
| 202206670 | 2 | m | 57 | 21.48 | I  | 72 | 73  | 0 | 20 | 5 | NA |
| 202206470 | 2 | m | 66 | 21.77 | I  | 76 | 78  | 0 | 30 | 5 | NA |
| 202206723 | 2 | m | 33 | 24.07 | I  | 94 | 97  | 2 | 15 | 4 | NA |
| 202206716 | 2 | f | 32 | 21.3  | I  | 76 | 71  | 1 | 10 | 4 | NA |
| 202206384 | 2 | f | 56 | 22.04 | II | 95 | 100 | 1 | 50 | 5 | NA |
| 202206700 | 2 | m | 33 | 23.94 | I  | 60 | 63  | 1 | 10 | 5 | NA |
| 202206783 | 2 | m | 16 | 29.39 | I  | 69 | 63  | 0 | 30 | 5 | NA |
| 202206775 | 2 | f | 41 | 22.86 | I  | 68 | 72  | 1 | 20 | 5 | NA |
| 202206805 | 2 | m | 67 | 23.67 | I  | 80 | 87  | 0 | 20 | 4 | NA |
| 202206834 | 2 | f | 43 | 23.88 | I  | 84 | 67  | 0 | 25 | 5 | NA |
| 202206801 | 2 | m | 24 | 22.86 | I  | 66 | 72  | 0 | 30 | 5 | NA |
